# Supplementary material for: Occurrence and Sources of Synthetic Musk Fragrances in the Sewage Treatment Plants and the Han River in Seoul, Korea
Source: Preprints.org preprint supplement (doi:10.20944/preprints202012.0711.v1), 2020-12-28
Supplement: Supplementary file 1 [file supplementary]

**Appendix A. Supplementary Materials**

Occurrence and Sources of Synthetic Musk Fragrances in Sewage Treatment Plants and the Han River in Seoul, Korea

Ju-Hee Hong1, Jun-Yeon Lee1, Hyun-Ju Ha1, Jin-Hyo Lee1, Seok-Ryul Oh1, Young-Min Lee2, Kyung-Duk Zoh2,* ,Mok-Young Lee1,*

*1Department of Water Environment Research, Seoul Metropolitan Government Research Institute of Public Health and Environment, Seoul, South Korea*

*2Department of Environmental Health Sciences, School of Public Health, Seoul National University, Seoul, South Korea*

Total pages: 6

Total tables:4

**Table of Contents**

**Text S1**. Quality assurance and quality control (QA/QC) of synthetic musk fragrances (SMFs)

**Table S1**. Basic information of four sewage treatment plants in highly populated urban area

Table S2. Recoveries, MDL and LOQ values for nine synthetic musk fragrances (SMFs)

**Table S3**. Chromatograms and mass spectra of the SMFs.

**Table S4**. Concentration of synthetic musk fragrances in sewage treatment plant (STPs) influent and effluent in other countries

**Text S1**. Quality assurance and quality control (QA/QC) of synthetic musk fragrances (SMFs)

Since samples can be easily contaminated by researcher wearing perfumes and cosmetics, we avoided the use of personal care products during the analysis. At first, blank was analysed with every twenty samples to confirm no contamination and then none of the target synthetic musk fragrances (SMFs) was detected. Seven samples using standard solution were analysed to calculate method detection level (MDL) and limit of quantification (LOQ) values. The LOQ of each SMF ranged from 0.002 to 0.007 μg/L. To confirm the stability of the analysis, two kinds of check standards were analysed every less than twenty samples, which were three levels of spiked blanks at 0.1 μg/L, 0.2 μg/L and 0.5 μg/L and a spiked field sample. Averages of recovery from spiked blanks ranged from 87.7% of MX to 98.6% of DPMI and relative standard deviation of any SMF didn’t exceed 10%. Average range of recovery from spiked samples was 78.9% to 107.2% which was wider than that from spiked blanks, and relative standard deviation of each SMF was 8.5% to 15.8%. The results are summarized in Table S2.

**Table S1**. Basic information of four sewage treatment plants in highly populated urban area

a; Anaerobic, anoxic and oxide, b; Modified Ludzack-Ettinger

| STPs | capacity  (m3/d) | input flow  (m3/d) | service population | main biological process |
| --- | --- | --- | --- | --- |
| S1 | 1,590,000 | 1,310,000 | 3,385,000 | A2Oa,MLEb |
| S2 | 900,000 | 759,000 | 1,681,000 | MLE, MLE |
| S3 | 860,000 | 553,000 | 1,957,000 | A2O, A2O |
| S4 | 1,630,000 | 1,585,000 | 3,591,000 | MLE |
| Total | 4,980,000 | 4,207,000 | 10,614,000 |  |

Table S2. Recoveries, MDL and LOQ values for nine synthetic musk fragrances (SMFs)

| SMFs | Recovery (%) | | MDL (σⅹ3.14)  (μg/L) | LOQ (σⅹ10)  (μg/L) |
| --- | --- | --- | --- | --- |
| Spiked blanks  (avg.±stdev) | Spiked samples  (avg.±stdev) |
| DPMI | 98.6 ± 9.8 | 107.2 ± 16.9 | 0.002 | 0.006 |
| ADBI | 95.9 ± 7.1 | 101.1 ± 9.9 | 0.001 | 0.003 |
| AHMI | 94.6 ± 6.3 | 100.0 ± 8.8 | 0.001 | 0.002 |
| HHCB | 96.2 ± 7.8 | 102.3 ± 11.6 | 0.002 | 0.005 |
| ATII | 96.1 ± 8.3 | 100.7 ± 10.7 | 0.001 | 0.003 |
| AHTN | 96.4 ± 7.8 | 98.4 ± 11.8 | 0.001 | 0.004 |
| MA | 90.3 ± 7.2 | 85.2 ± 8.8 | 0.002 | 0.007 |
| MX | 87.7 ± 6.3 | 78.9 ± 6.7 | 0.002 | 0.007 |
| MK | 86.2 ± 4.6 | 88.5 ± 11.9 | 0.002 | 0.005 |

**Table S3**. Chromatograms and mass spectra of the SMFs.

| Component name | CAS No. | Observed m/z  QI(RI) | Observed RT (min) | Chromatogram | Mass spectra |
| --- | --- | --- | --- | --- | --- |
| DPMI | 33704-61-9 | 135(206,163) | 7.728 |  |  |
| ADBI | 13171-00-1 | 229(173, 244) | 12.617 |  |  |
| AHMI | 15323-35-0 | 229(244, 187) | 13.703 |  |  |
| HHCB | 1222-05-5 | 243(213, 149) | 16.366 |  |  |
| ATII | 68140-48-7 | 215(243, 173) | 16.435 |  |  |
| AHTN | 21145-77-7 | 243(187, 159) | 16.814 |  |  |
| MA | 83-66-9 | 253(91, 77) | 15.408 |  |  |
| MX | 81-15-2 | 282(43, 59) | 16.200 |  |  |
| MK | 81-14-1 | 279(294, 280) | 19.469 |  |  |

**Table S4**. Concentration of synthetic musk fragrances in sewage treatment plant (STPs) influent and effluent in other countries

| Category | |  | | DPMI | | ADBI | | AHMI | | HHCB | | ATII | | AHTN | | MX | | MK | | Reference | |
| --- | --- | --- | --- | --- | --- | --- | --- | --- | --- | --- | --- | --- | --- | --- | --- | --- | --- | --- | --- | --- | --- |
| STP influent | | Spain | | N.D-0.112 | | N.D-0.032 | | N.D-0.031 | | 0.360-2.219 | | N.D-0.027 | | 0.019-0.264 | | 0.045-0.232 | | N.D-0.084 | | Ramirez et al., 2012 | |
| China | | N.D | | N.D | | N.D | | 2.300 | | N.D | | 0.717 | | N.D | | 0.743 | | Zhang et al., 2008 | |
| USA | | N.D-0.427 | | N.D-0.045 | | N.D-0.950 | | 4.772-13.399 | | N.D | | 0.509-2.337 | | N.D | | N.D-0.812 | | Chase et al., 2012 | |
| Canada | | - | | 0.0345 | | 0.0220 | | 1.701 | | 0.131 | | 0.687 | | - | | - | | Lishman et al., 2006 | |
| STP Effluent | Spain | | N.D-0.082 | | N.D-0.025 | | N.D-0.011 | | 0.288-0.954 | | N.D | | 0.025-0.028 | | 0.040-0.096 | | N.D-0.020 | | Ramirez et al., 2012 | |  |
| China | | N.D | | N.D | | N.D | | 0.297 | | N.D | | 0.086 | | N.D | | 0.080 | | Zhang et al., 2008 | |  |
| USA | | N.D-0.421 | | N.D | | N.D-0.129 | | 3.259-10.525 | | N.D | | 0.336-1.754 | | N.D | | N.D-0.151 | | Chase et al., 2012 | |  |
| Canada | | - | | 0.0200 | | N.D | | 0.876 | | 0.047 | | 0.298 | | - | | - | | Lishman et al., 2006 | |  |
